# Supplementary material
Source: Springer Nature journal article supplement (https://www.springermedizin.de/resource/supplementary/12984_2011_412_MOESM10_ESM.pdf/9605924)

(a)

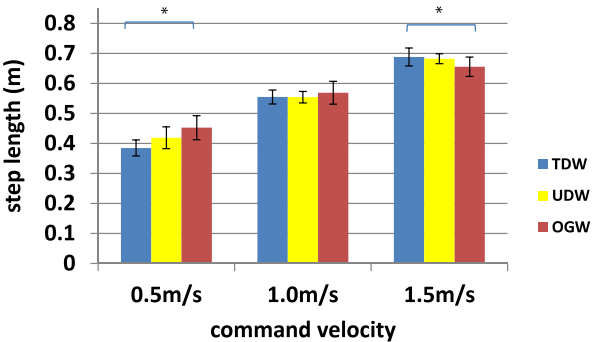

(b)

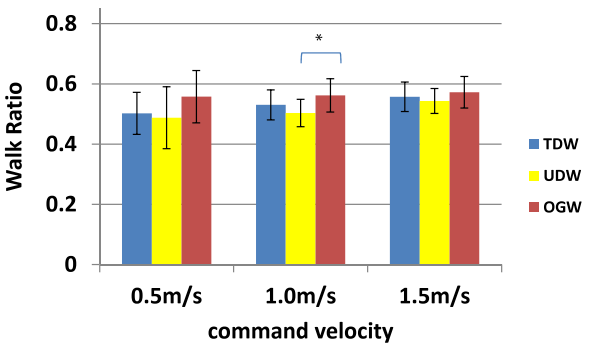

(c)

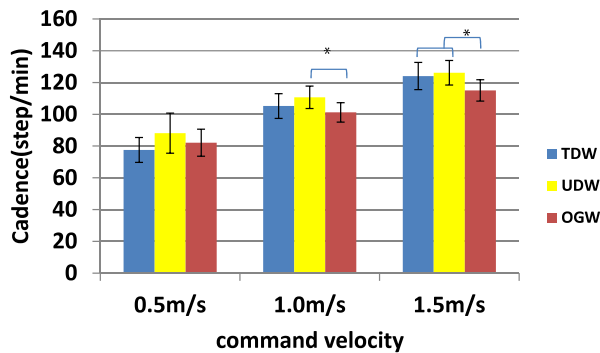

(d)

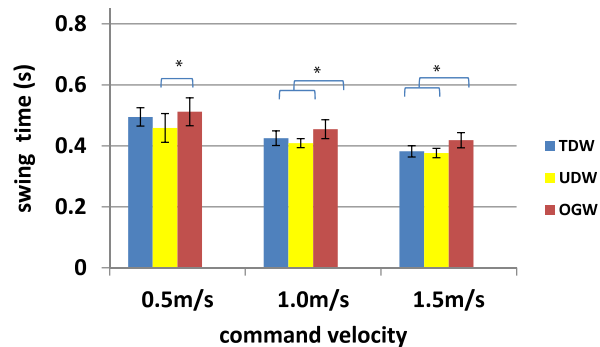

Supplement: MOESM10 [file 9605924]
